# Supplementary material for: Interaction Effect between Physical Activity and the BDNF Val66Met Polymorphism on Depression in Women from the PISMA-ep Study
Source: MDPI journal article supplement (doi:10.3390/ijerph19042068), 2022-02-12
Supplement: s1 [file s1]

## Supplementary

**Table S1.** Relationships between Val66Met genotype and physical activity variables. Statistically significant results are highlighted in bold.

|                                       | Total sample (3123)      |                                                |                                           | Women (1554)         |                                            |                                            | Men (1569)           |                                            |                                                   |
|---------------------------------------|--------------------------|------------------------------------------------|-------------------------------------------|----------------------|--------------------------------------------|--------------------------------------------|----------------------|--------------------------------------------|---------------------------------------------------|
|                                       | <i>Val/Val</i><br>(1947) | <i>Met allele</i><br><i>carriers</i><br>(1176) | <i>Adjusted* OR</i><br>(95% CI), <i>P</i> | <i>Val/Val</i> (969) | <i>Met allele</i><br><i>carriers</i> (585) | <i>Adjusted** OR</i><br>(95% CI), <i>P</i> | <i>Val/Val</i> (978) | <i>Met allele</i><br><i>carriers</i> (591) | <i>Adjusted** OR</i><br>(95% CI), <i>P</i>        |
| <i>Physical activity</i>              |                          |                                                |                                           |                      |                                            |                                            |                      |                                            |                                                   |
| None                                  | 829 (43%)                | 431 (37%)                                      |                                           | 431 (44%)            | 245(42%)                                   |                                            | 398 (41%)            | 186 (31%)                                  |                                                   |
| Yes                                   | 1118 (57%)               | 745 (63%)                                      | <b>1.26 (1.08–1.47),<br/>0.002</b>        | 538 (56%)            | 340 (58%)                                  | 1.09 (0.88-1.35),<br>0.403                 | 580 (59%)            | 405 (69%)                                  | <b>1.48 (1.19–1.84),<br/>5.28x10<sup>-4</sup></b> |
| <i>Intensity of physical activity</i> |                          |                                                |                                           |                      |                                            |                                            |                      |                                            |                                                   |
| None                                  | 829 (43%)                | 431 (37%)                                      |                                           | 431 (44%)            | 245(42%)                                   |                                            | 398 (41%)            | 186 (31%)                                  |                                                   |
| Light                                 | 385 (20%)                | 239 (20%)                                      | 1.04 (0.87–1.25),<br>0.65                 | 216 (22%)            | 134 (23%)                                  | 1.04 (0.81-1.33),<br>0.761                 | 169 (17%)            | 105 (18%)                                  | 1.05 (0.80–1.38),<br>0.716                        |
| Moderate                              | 589 (30%)                | 399 (34%)                                      | 1.17 (1.00–1.36),<br>0.055                | 285 (30%)            | 167 (28%)                                  | 0.94 (0.74-1.82),<br>0.608                 | 304 (31%)            | 232 (39%)                                  | 1.41 (1.14–1.76),<br>1.74x10 <sup>-3</sup>        |
| Vigorous                              | 144 (7%)                 | 107 (9%)                                       | 1.21 (0.92–1.58),<br>0.164                | 37 (4%)              | 39 (7%)                                    | 1.75 (1.09-2.80),<br>0.019                 | 107 (11%)            | 68 (12%)                                   | 1.01 (0.72–1.40),<br>0.957                        |

Abbreviations: CI, confidence interval; OR, odds ratio; *P*, p-value. \* Adjusted by age, BMI and sex. \*\* Adjusted by age and BMI. Statistically significant results are highlighted in bold
